# Supplementary material for: Wild Soybean Oxalyl-CoA Synthetase Degrades Oxalate and Affects the Tolerance to Cadmium and Aluminum Stresses
Source: PubMed Central journal article supplement (PMC7700444; doi:10.3390/ijms21228869), 2020-11-23
Supplement: ijms-21-08869-s001.pdf [file ijms-21-08869-s001.pdf]

## *Supplementary Material*

### 1 Supplementary Data

#### Data S1A

#### **CDS sequencing information of *GsAAE3* (GenBank accession number: MN399820)**

ATGAAAGACACAATGGAAACTCCTACGACACTCACCACCTTGCTCCGCCACGTCGC  
CGCCAAATTCCTCCCGCCGTGCCATCTCCGTCGCTGCCAAATTCGACCTCACCCA  
CTCCCGCCTCCACCGCCTGGTCGAATCCGCCGCCGCTCAGTTAGTCTCCGCCGGCGT  
CAAACCCGGCGACGTCGTCGCCCTCACCTTCCCCAACACCATCGAGTTTGTAGTCAT  
GTTCTAGCCGTCATTCGGGCTCGAGCCACAGCCGCGCCGTTAAACTCGGCTTACAC  
AGCGGAAGAGTTTCGAGTTTTACTTATCCGACTCGGAGTCCAAGCTCCTCCTAACATC  
ACCAGAAGGAAACAAGCCTGCTCAAGCCGCGGCTTCAAAGCTCAGCATCCCCAC  
GCCACGGCTTCGATTACCAAAGCCGAGAACGAAGAAGCGGAGCTGAGTCTCTCATT  
ATTAAACCACCCCGAGTTGAATTCCGTTAACTCAGTTGAGTCACTCGTTAACGACCC  
TGATGACGTGGCACTTTTCCTTCACACCTCTGGCACCACGAGCCGTCCCAAGGGAGT  
GCCGCTGACTCAGTACAACCTTCTCTCTTCGGTGAAGAACATCGACTCAGTGTACCG  
ACTCACTGAGTCCGACTCGACGGTGATTGTTCTTCTCTCTTCCACGTGCACGGGTTA  
ATCGCCGGATTGCTGAGCTCCCTCGGCGCCGGAGCTGCGGTGGCGCTTCCGGCGGC  
GGGGAGGTTCTCCGCCTCGGCGTTTTGGAAGGACATGATTAAATACAGCGCCACAT  
GGTACACCGCGGTTCCCACCATAACACCAGATCATACTTGATCGCCACTCCAGCAAC  
CCCGAACCGGTTTACCCGCGGCTCCGGTTCATCCGAAGCTGCAGCGCCTCGCTCGC  
ACCGGTTATACTCGGTAAACTCGAGGAGGCTTTCGGTGCACCGGTTTTAGAGGCCTA  
TGCGATGACGGAAGCGTCGCATTTGATGGCTTCGAACCCTTTGCCACAAGATGGGG  
CCCACAAGTCCGGGTCGGTTGGGAAACCCGTGGGTCAGGAAATGGGCATTTTAGAC  
GAATCGGGTCGGGTCCAAGAGGCTGGTATCAGTGGAGAGGTTTGCATTCGGGGATC  
CAATGTTACGAAAGGATATAAAAATAACGTGGCAGCAAATACGGCGTCGTTTCTGT  
TCGATTGGTTTCATACTGGTGATATTGGATACTTTGATTCTGATGGGTATTTGCATCT  
CGTGGGTCGGATCAAGGAACTCATCAACCGAGGAGGTGAAAAGATATCACCAATA  
GAAGTGGATGCTGTTCTTCTTTCACATCCAGAAATTGCTCAAGCAGTTGCTTTTGA  
GTGCCTGATGCCAAGTATGGAGAGGAGATATATTGTGCTGTCATCCCAAGAGAAGG  
ATCAAACGTTGATGAGGCAGAGGTGCTAAGATTTAGCAAGACCAATCTTGCATCCT  
TCAAAGTACCAAAAAGGTCTTCACTGATTCTTTACCCAAAACCTGCCACAGGC  
AAGATTTTGCGCCGTCTTGTGGCAGAACACTTTGTCTCTCAAATTTGA

## Data S1B

**Promoter sequencing information of GsAAE3 (GenBank accession number: MN684205)**

GTCTTGCATACAATCACTCACATTATGACAAGTCTTTAAAATTTTAAAATAACATAT  
AAAATATTAATTAAGTTCATGTTACTGTTAATTCTTTCCCCCTTGCAAGCCATAAC  
CTTTACCAATCCTCCTCAAATGTCGTGGCCCACACCTCCAATCTCCAGAGCCCCACC  
ATAACCATCAATCTCAGTTTCTAAAGTGGAAATCAATGCTACGATTTTGACACAAGTA  
AAAAAATAATCAATGTTATGCTTTAAAACAATTATTTAATTAGGTCTGTTCACAAAC  
TATTAAGATGAAATTTGTTGAATAAAGGAATAATTAGAAGACAAACACGCATCCA  
TATAAAACACTTTTTTTTGGCGCAATTATTTTAATTAAGAAAAATCCCCTTGCAATC  
TGTTTGGCATGGTACCTCAACATGTAACTCATAATAAGGGAACACCCTACTCAAT  
AAGCAGCTTCACCAAAGACCCTCCTTTTAGAAGTCCCATTTGTCGACGACGATCTCT  
AAGGAGAGGTGATGCATGCTTTGGGAAGAGGTGTTGATGGTATCTTGAAGGAGGT  
GACCGTGGCGGCTTGGGGAGGTGTAGGCTATTTGAAGAAAGGAGGGTTGGGTTGAG  
AGAGAAGATGAGTTTACATTCAAGTGGATCCTTTTAATTTTGTTTCATATATTTGTTTT  
TTATTTTTAGATTTTATGAGTCGTCACTTTTTAAGTGGTTGTGTACAAAAATGACGTG  
TTGCGTGTGTATATACAAGACTTCCTCGTAATTTCTATTGTTGAAAAACATGAAACA  
ATAATAGTCACAATGGATAACTAGGGTTTTTCAATTAACCTTTTTGTTAAACACAAGT  
AGTGATCACCCGTCAGTGTACTTGAGTTATTTTTTTTTTCTTTTTTTTACAAAATATAC  
TTGAGTTGGTCACTTGATTTTTTTTTTGTAGACACAAGTTATCCGCATCATAAAC  
AGTAAAGATCAACCTAAAATTCAAATTCCTAAATCACTTATTAATAAACATAATTCA  
TTATATTTTTGTGAATCTTTGTTAGTTGTATTCTGATTTTATTATTTTCAATATGTTTTA  
ATTAATAAAAAGTATATATATATATATATATATATATATATATATATATATATATTTGTATTAC  
TAGTCCCTCCCGATTCTGATTATCTTTCTCGAAAACAAACCTTCCCAGATAAAGAGT  
TAGTGGAAAAATTTAATAAATGCATGTAGGGCAAAAAAAAAAGAGGAAAACTCCGAG  
ACTCTCAACTCAAATTTCTCGTCAAAGTCTCCAATAGTCACATCAAGAAATAAA  
AAAGTATAGTTAGTGAATAAATTGAAAACTAATTTACTTTAATAACTCAAATCGA  
TCTACGGTCAATTTCTCTTTGATTAATAAATATATTAATCAATTTAATCCATTACAT  
TATAAAAATAATTTAGTTATTAACCTTAGTACTAATTACTAACCGCTAGTTTTATTTAT  
AATTTCTGATTAATTTAATTCTTGTTTTTATTTTATTTAAGAATTTATAATAAATAA  
AAATAATTCTATTAAGTAGAAGCTGGGTGCTGGCCAGACAGATTTGACTACGCGG  
CGTGTGCCAATGCCATTGTACACGAACCATCCCCTCTTCTCCATTCCACGAACCCA  
ACTTTGCCTTCTTTTTTCAATCCCAGATAACCACCTTCCCTCTATCCCTATATATATATAT  
TAACACAACACAAATTCACAACCTCATTCACTTCACAATTCATCAACATCTAACACC  
ACACACACGCAACACGCTTCAGCCACTATTCTTCAAGGAAAAACAAA

## 2 Supplementary Figures and Tables

### 2.1 Supplementary Figures

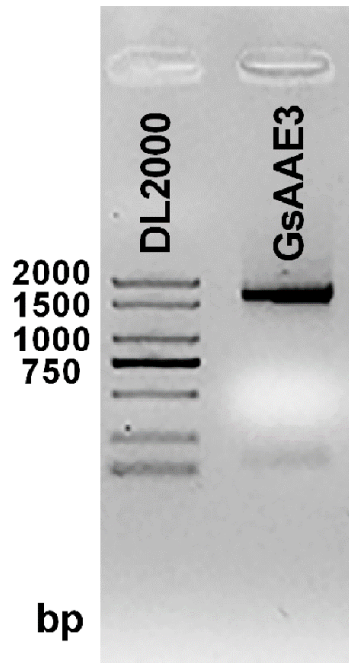

**Supplementary Figure S1.** The *GsAAE3* CDS fragment was examined by agarose gel electrophoresis.

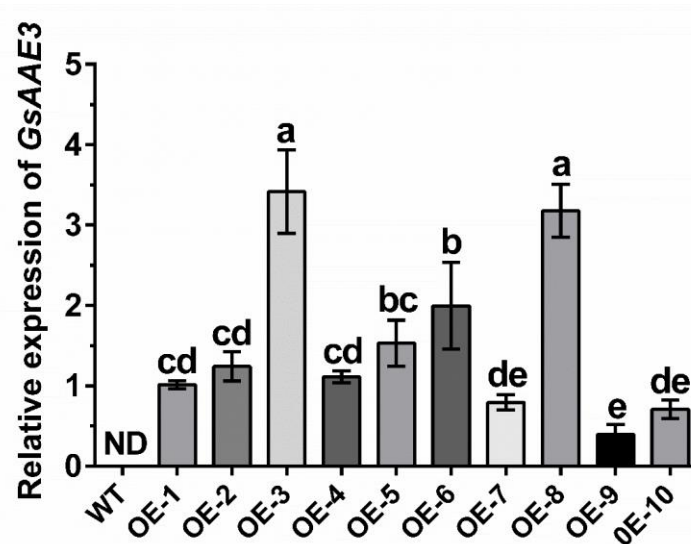

**Supplementary Figure S2.** Quantitative real-time PCR (qRT-PCR) analysis of overexpressing *GsAAE3 Arabidopsis* lines. ND, not detected. Data are means  $\pm$  SD of three

biological replicates. Different letters indicate statistically significant difference, using one-way ANOVA and Duncan's test ( $P \leq 0.05$ ).

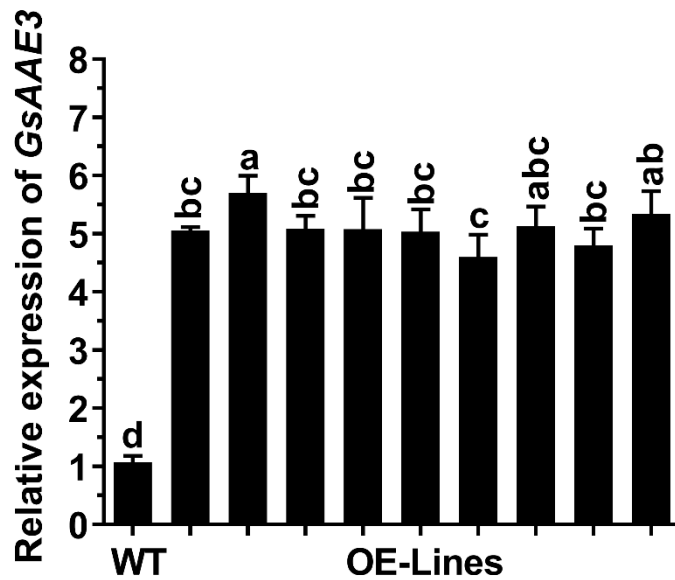

**Supplementary Figure S3.** Quantitative real-time PCR (qRT-PCR) analysis of overexpressing *GsAAE3* soybean hairy roots. Data are means  $\pm$  SD of three biological replicates. Different letters indicate statistically significant difference, using one-way ANOVA and Duncan's test ( $P \leq 0.05$ ).

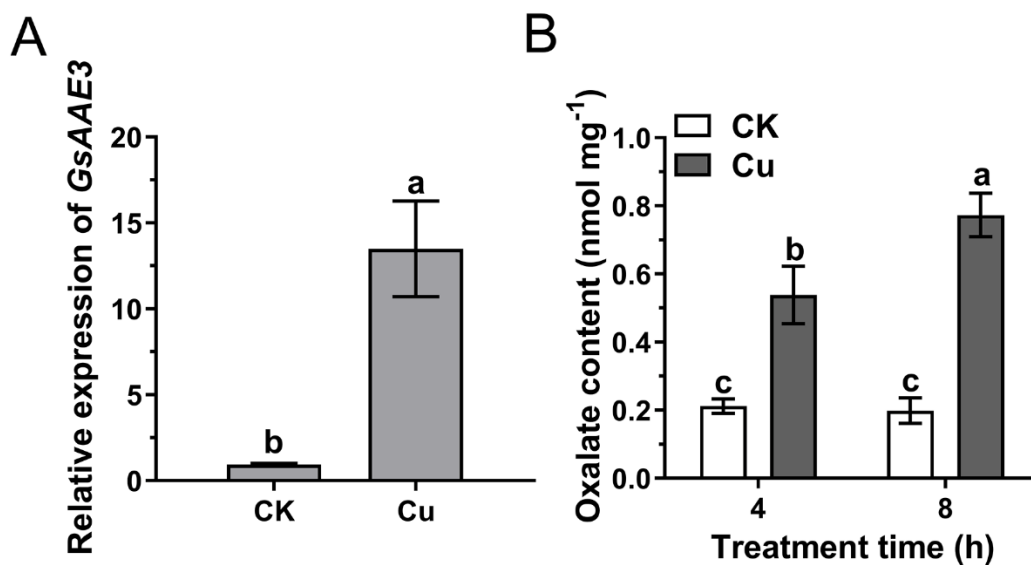

**Supplementary Figure S4.** (A) Relative expression of *GsAAE3* in wild soybean root tips (0-2 cm). The seedlings were cultured in nutrient solution as control (CK) or the same nutrient solution added with 30  $\mu\text{M}$   $\text{CuCl}_2$  for 4 hours. (B) The effect of Cu stress on wild soybean root tip oxalate content. The seedlings were exposed to nutrient solution containing 0 or 30  $\mu\text{M}$   $\text{CuCl}_2$  for 4 or 8 h. Data are means  $\pm$  SD of three biological replicates. Different letters indicate statistically significant difference, using one-way ANOVA and Duncan's test ( $P \leq 0.05$ ).

## 2.2 Supplementary Tables

Table S1 The data analysis of *GsAAE3* gene expression profiles from BW69 line of *Glycine soja*.

| Gene          | Gene ID   | GenBank Acc | Description                                 | Log2(AI/CK) |
|---------------|-----------|-------------|---------------------------------------------|-------------|
| <i>GsAAE3</i> | 100817853 | BW679327.1  | Oxalate--CoA ligase / Oxalyl-CoA synthetase | 1.71        |

Table S2 List of primers.

| Serial number | Primer name              | Primer sequence (5'-3')                          | Purpose                        |
|---------------|--------------------------|--------------------------------------------------|--------------------------------|
| 1             | <i>GsAAE3</i> -F         | ACACGCTTCAGCCACTATTC                             | <i>GsAAE3</i> CDS cloning      |
| 2             | <i>GsAAE3</i> -R         | CTCTATTATTGTATCCTGTAGG                           |                                |
| 3             | <i>GsAAE3</i> -proF      | GTCGCACTCCATTAGGCTATG                            | <i>GsAAE3</i> promoter cloning |
| 4             | <i>GsAAE3</i> -proR      | AAACTCGAACTCTTCCGCTGT                            |                                |
| 5             | pTF101- <i>GsAAE3</i> -F | gagaacacgggggactctagaATGAAAGACACAATGGAAACTCC     | <i>GsAAE3</i> -pTF101.1        |
| 6             | pTF101- <i>GsAAE3</i> -R | cgatcggggaaattcgagctcTCAAATTTGAGAGACAAAGTGTTCTG  |                                |
| 7             | p3301- <i>GsAAE3</i> -F  | tatgaccatgattacgaattcGTCTTGCATACAATCACTCACATTATG | <i>GsAAE3</i> -pCAMBIA3301     |
| 8             | p3301- <i>GsAAE3</i> -R  | ttaccctcagatctaccatggTTTGTTCCTTGAAGAATAGTGGC     |                                |
| 9             | p1302- <i>GsAAE3</i> -F  | tatgaccatgattacgaattcctATGAAAGACACAATGGAAACTCC   | <i>GsAAE3</i> -pCAMBIA1302     |
| 10            | p1302- <i>GsAAE3</i> -R  | tactagtcagatctaccatggAATTTGAGAGACAAAGTGTTCTGCC   |                                |
| 11            | pET28a- <i>GsAAE3</i> -F | cagcaaatgggtcgcggatccATGAAAGACACAATGGAAACTCC     | <i>GsAAE3</i> -pET28a          |
| 12            | pET28a- <i>GsAAE3</i> -R | gtggtggtggtggtgctcgagTAATTTGAGAGACAAAGTGTTCTGCC  |                                |
| 13            | GmActin6F                | GCACCACCGGAGAGAAAATA                             | qRT-PCR                        |
| 14            | GmActin6R                | GTGCACAATTGATGGACCAG                             |                                |
| 15            | AtActin2F                | GGTATTGTGCTGGATTCTGG                             |                                |
| 16            | AtActin2R                | CGCTCTGCTGTTGTGGTGA                              |                                |
| 17            | q <i>GsAAE3</i> -F       | TACGGCGTCGTTTCTGTT                               |                                |
| 18            | q <i>GsAAE3</i> -R       | CTCGGTTGATGAGTTCCTTG                             |                                |
| 19            | 35S-F                    | CCTTCGCAAGACCCTTCCTC                             | Molecular identification       |
| 20            | GUS-R                    | GTTGGGGTTTCTACAGGACG                             |                                |
